# Supplementary material for: Resistance to Carcinogenesis in the Spiny Mouse (Acomys) correlates with upregulation of multiple tumor suppressor genes
Source: Research Square preprint supplement (doi:10.21203/rs.3.rs-6221361/v1), 2025-06-04
Supplement: Supplementary file [file 8d1c82c83aa02257fc5314a0.pdf]

**A**

**Day 1**

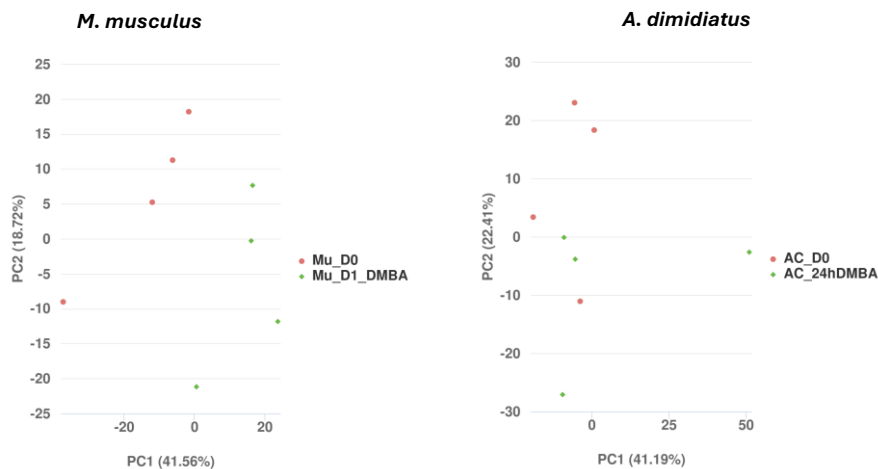

**B**

**Day 14**

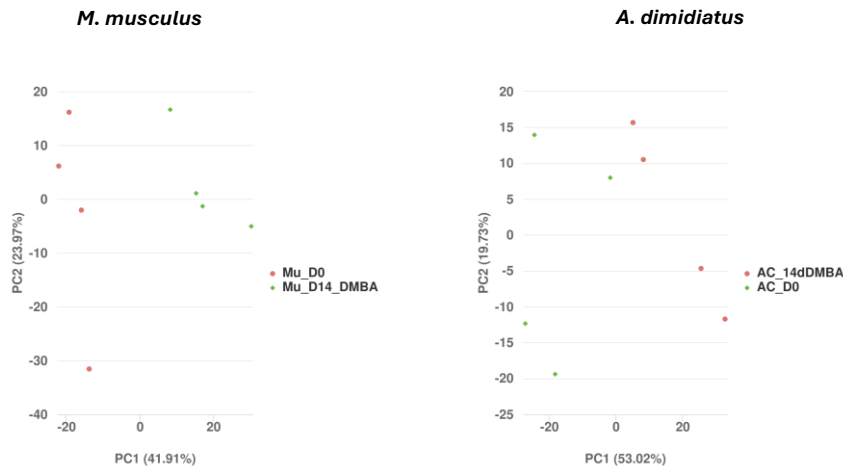

**C**

**Day 28**

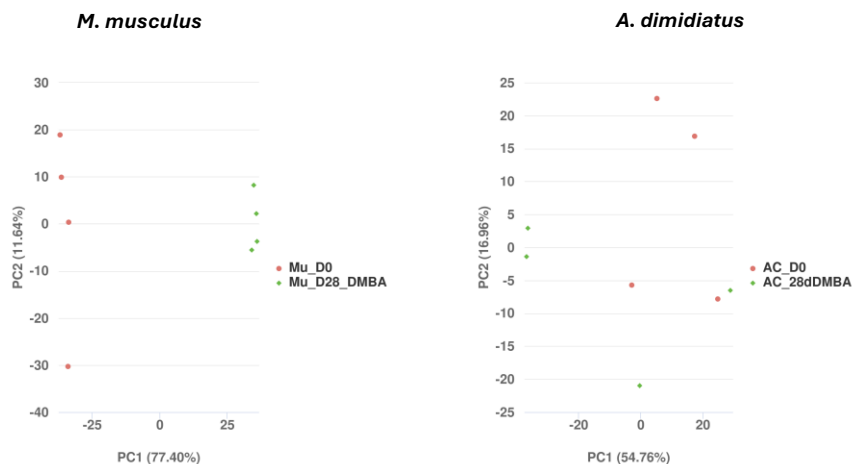

**Supplementary Figure 1 - Principal component analysis (PCA) for *Acomys dimidiatus* and *Mus musculus* samples. (A)** PCA analysis of samples collected one day after application of DMBA in both *A. dimidiatus* and *M. musculus*. **(B)** PCA analysis of samples collected 14 days after application of short-term DMBA/TPA protocol in both *A. dimidiatus* and *M. musculus*. **(C)** PCA analysis of samples collected 28 days after application of short-term DMBA/TPA protocol in both *A. dimidiatus* and *M. musculus*. MM\_D0 represent *M. musculus* samples at day 0, AC\_D0 represent *A. dimidiatus* samples at day 0, MM\_D1\_DMBA represent *M. musculus* samples collected 1 day after treatment with DMBA, AC\_D1\_DMBA represent *A. dimidiatus* samples collected 1 day after treatment with DMBA, MM\_D14\_DMBA represent *M. musculus* samples collected 14 days after treatment with DMBA/TPA, AC\_D14\_DMBA represent *A. dimidiatus* samples collected 14 days after treatment with DMBA/TPA, MM\_D28\_DMBA represent *M. musculus* samples collected 28 days after treatment with DMBA/TPA, AC\_D28\_DMBA represent *A. dimidiatus* samples collected 28 days after treatment with DMBA/TPA.

**A****Biological Processes****Upregulated**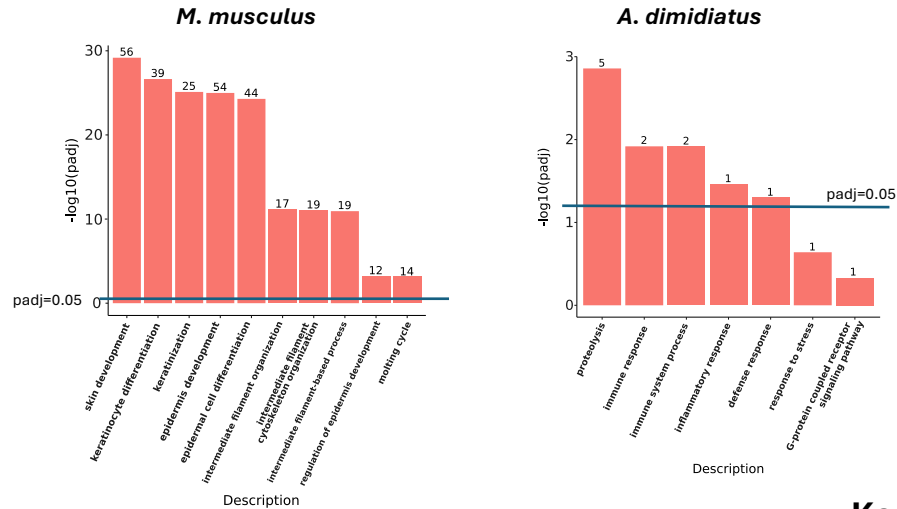**Downregulated**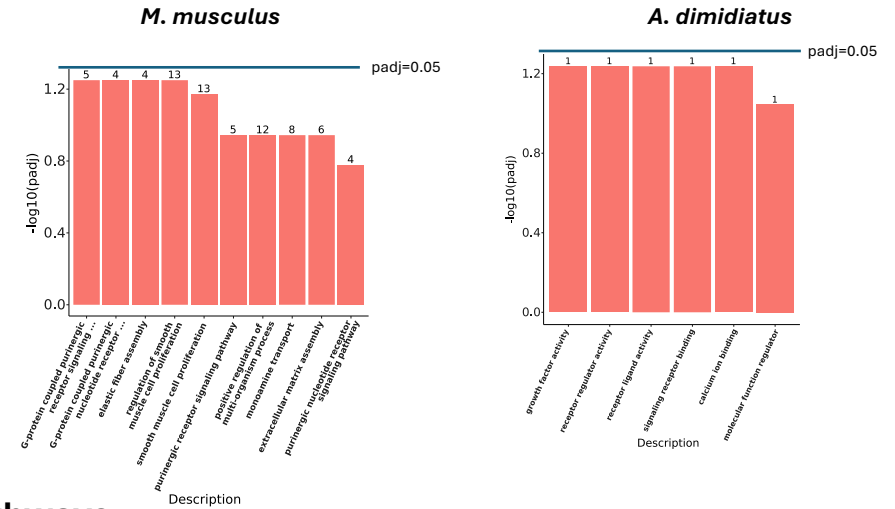**B****Kegg Pathways****Upregulated**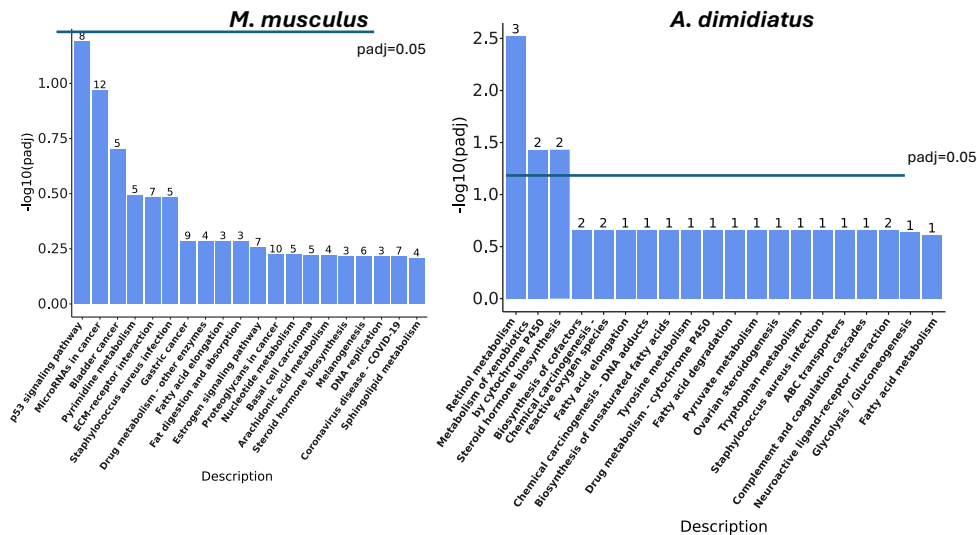**Downregulated**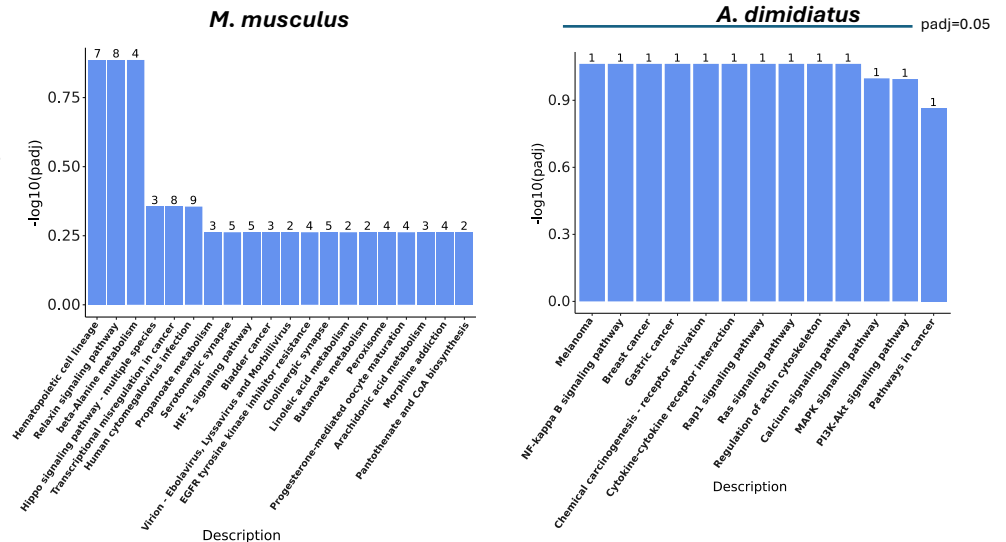

**Supplementary Figure 2 - DMBA treatment upregulated several GO biological processes and Kegg pathway. (A)** GO Biological processes upregulated and downregulated in *Mus musculus* and *Acomys dimidiatus*, 24h after the treatment with DMBA. **(B)** Kegg pathways upregulated and downregulated in *M. musculus* and *A. dimidiatus*, 24h after the treatment with DMBA.



**A****Biological Processes****Upregulated**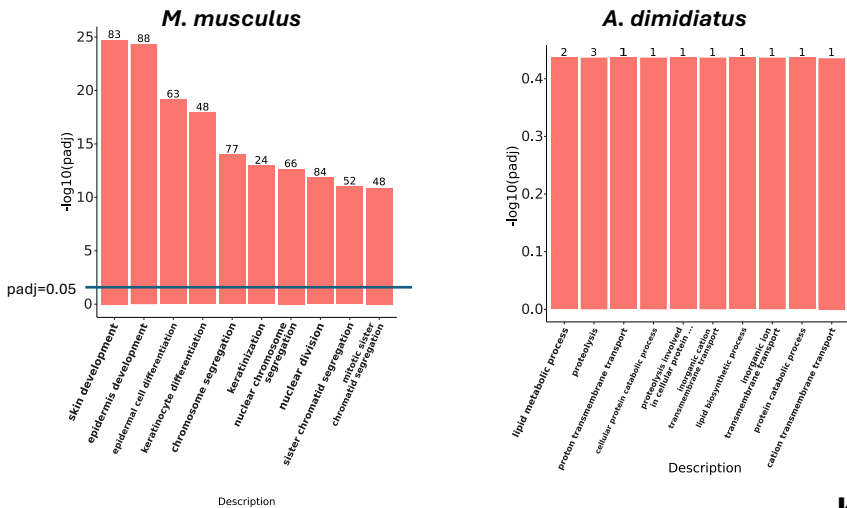**Downregulated**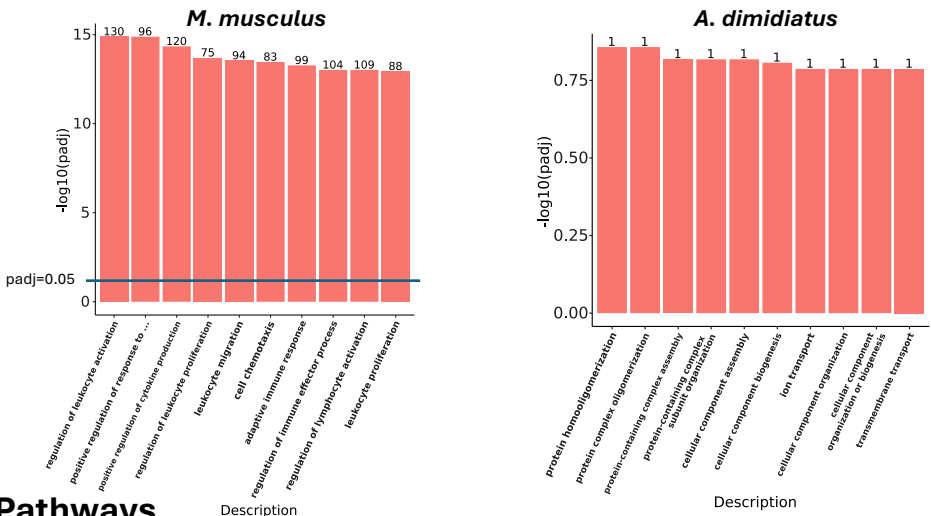**B****Kegg Pathways****Upregulated**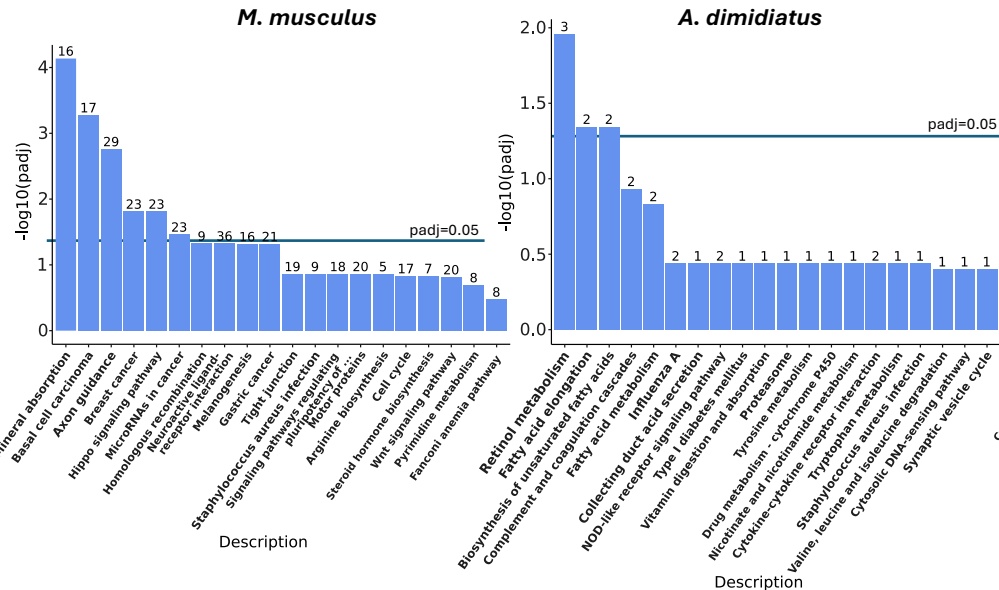**Downregulated**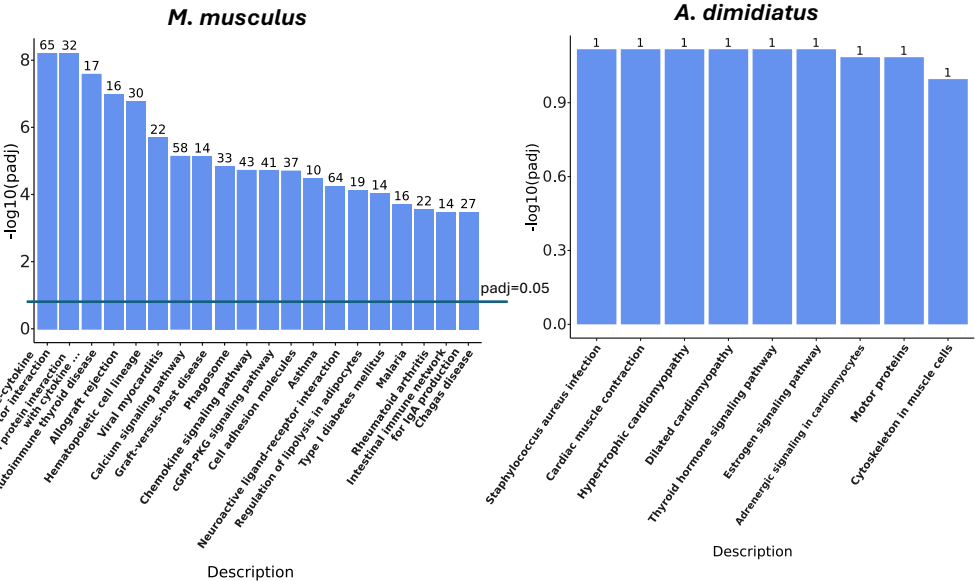

**Supplementary Figure 4 – Short-term DMBA/TPA treatment during 28 days upregulated several GO biological processes and Kegg pathway in *Mus* but not in *Acomys*. (A) GO Biological processes upregulated and downregulated in *Mus musculus* and *Acomys dimidiatus*, 28 days after the treatment with DMBA. (B) Kegg pathways upregulated and downregulated in *M. musculus* and *A. dimidiatus*, 28 days after the treatment with DMBA.**
